# Supplementary material for: Electron Tomography as a Tool to Study SARS-CoV-2 Morphology
Source: Preprints.org preprint supplement (doi:10.20944/preprints202410.0235.v1), 2024-10-07
Supplement: Supplementary file 1 [file supplementary]

## **Supplementary materials**

### **Electron tomography as a tool to study SARS-CoV-2 morphology**

*Wu et al.*

**Supplementary Video 1.** Representative 3D ET images of HIV-1 in 293T cells reconstituted from the epoxy resin-embedded samples used in Ref. 76. Left and right panels are Y rotation and Z slice position images of the HIV-1 virion, respectively.

**Supplementary Video 2.** 3D ET images of TFV 17D particles found in the intracellular vacuole of infected Vero cells.
